# Supplementary material
Source: publisher site journal article supplement (https://www.dovepress.com/article/387831)

### Supplementary Figure 1. Flow diagram of study methodology

**Inclusion:** 8 to 18 years, BCVA of better than 20/20 in each eye and Refractive error within +/- 10.00D for sphere and +/- 5.00D for cylinder

**Exclusion:** Presence of significant media opacity, ocular conditions affecting vision, contraindications to cycloplegic agent, history of eye surgery, active infections or inflammation, and current usage of any drugs that can affect visual acuity.

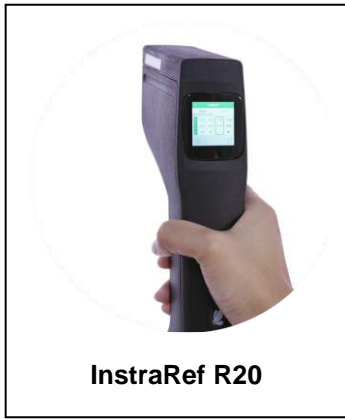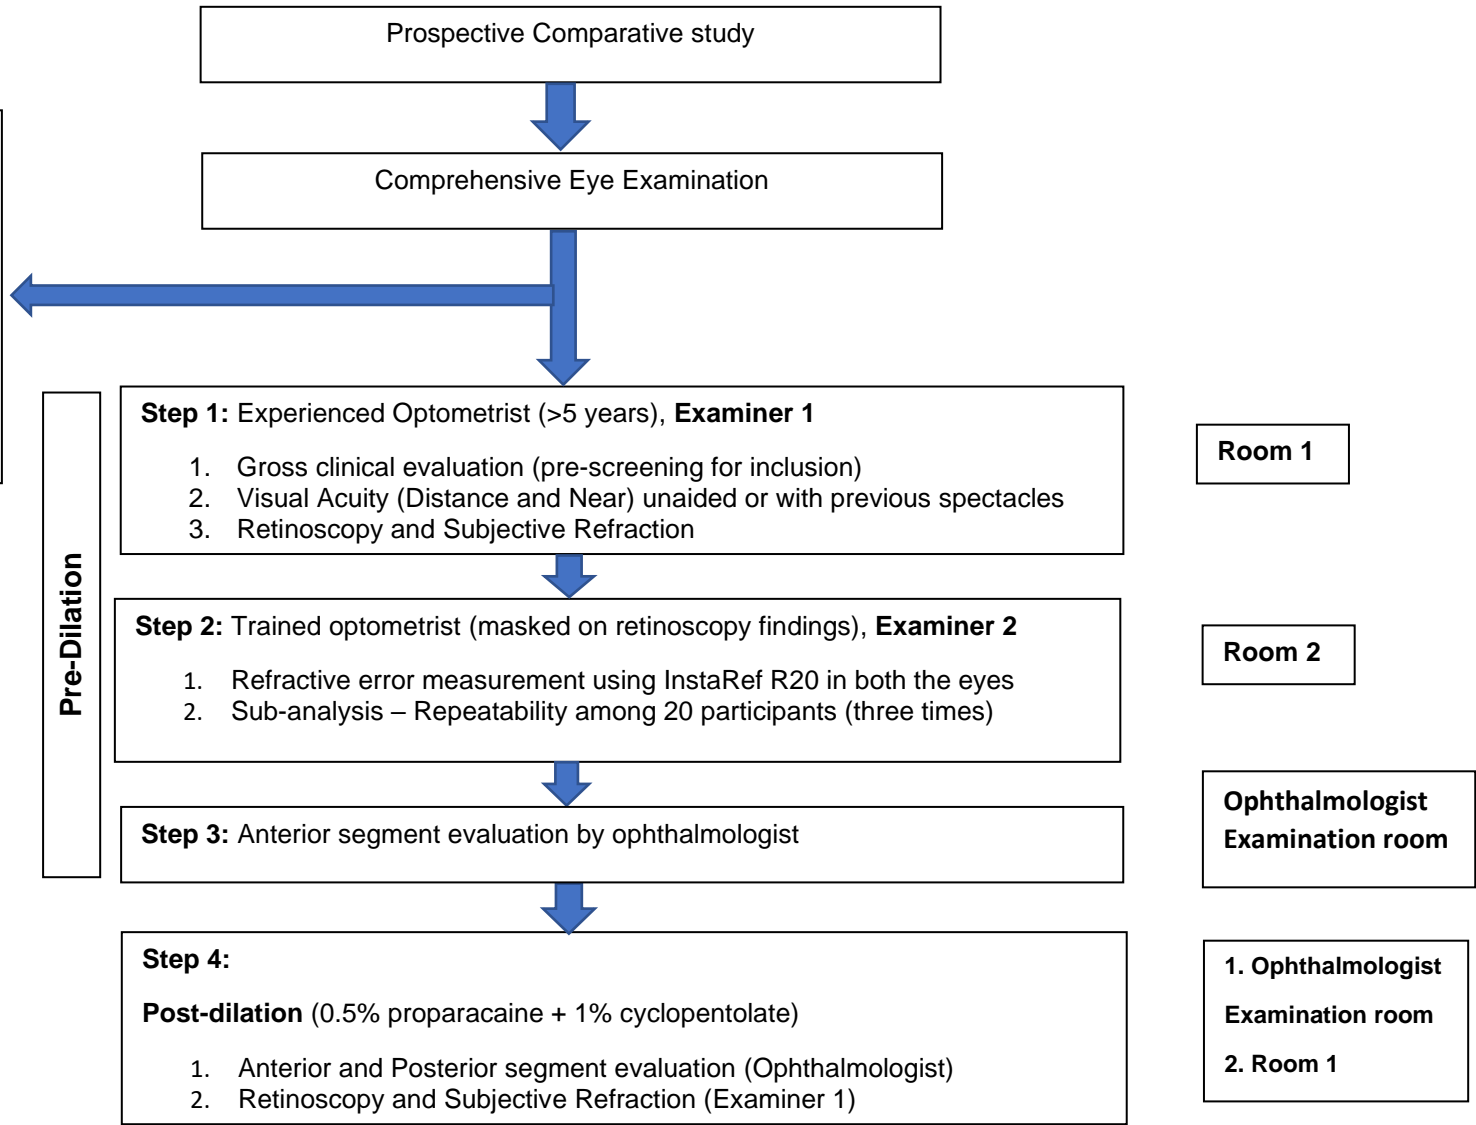

Supplement: Supplementary file 1 [file get_supplementary_file.php]
